1 Labour sharing promotes coexistence in atrazine degrading bacterial  
2 communities

3  
4 **Authors:** Loren Billet<sup>1</sup>, Marion Devers<sup>1</sup>, Nadine Rouard<sup>1</sup>, Fabrice Martin-Laurent<sup>1</sup> & Aymé Spor<sup>1#</sup>

5

6 **Authors' affiliation:**

7 <sup>1</sup>*Agroécologie, AgroSup Dijon, INRA, Univ. Bourgogne, Univ. Bourgogne Franche-Comté, F-*  
8 *21000 Dijon, France*

9

10 **#Corresponding author:** A. Spor, [ayme.spor@inra.fr](mailto:ayme.spor@inra.fr)

11

12

13 **Keywords:** Black Queen Hypothesis, atrazine biodegradation, public goods, coexistence

14

## 15 SUMMARY

16 Microbial communities exert a pivotal role in the biodegradation of xenobiotics including  
17 pesticides<sup>1</sup>. In the case of atrazine, multiple studies have shown that its degradation involved a  
18 consortia rather than a single species<sup>2,3,4,5</sup>, but little is known about how interdependency between  
19 the species composing the consortium is set up. The Black Queen Hypothesis (BQH) formalized  
20 theoretically the conditions leading to the evolution of dependency between species<sup>6</sup>: members of  
21 the community called ‘helpers’ provide publicly common goods obtained from the costly  
22 degradation of a compound, while others called ‘beneficiaries’ take advantage of the public goods,  
23 but lose access to the primary resource through adaptive degrading gene loss. Here, we test whether  
24 liquid media supplemented with the herbicide atrazine could support coexistence of bacterial  
25 species through BQH mechanisms. We observed the establishment of dependencies between species  
26 through atrazine degrading gene loss. Labour sharing between members of the consortium led to  
27 coexistence of multiple species on a single resource and improved atrazine degradation potential.  
28 Until now, pesticide degradation has not been approached from an evolutionary perspective under  
29 the BQH framework. We provide here an evolutionary explanation that might invite researchers to  
30 consider microbial consortia, rather than single isolated species, as an optimal strategy for isolation  
31 of xenobiotics degraders. Also, we anticipate that future research should focus on the  
32 bioaugmentation with stabilized and tightly structured microbial degrading consortia as an effective  
33 solution for *in situ* bioremediation of sites polluted with recalcitrant compounds.

34

35 **TEXT**

36 Microorganisms in nature usually co-exist as communities whose complexity is under the influence  
37 of local environmental conditions and interindividuals interactions. Spatially structured  
38 environments, such as biofilms, are more prone to support coexistence of multiple species  
39 consuming the same resource because access to the resource and its metabolic by-products is  
40 conditioned by the structure of the environment<sup>7,8</sup>. Interactions of various nature between bacterial  
41 species that stabilize the community diversity can then arise and persist, but are most likely to  
42 disappear when the structure is disrupted<sup>9,10</sup>. In mixed liquid cultures, competition for a single  
43 resource is supposed to lead to competitive exclusion<sup>11</sup>. However, if the breaking down of the  
44 resource includes both private and public goods, natural selection could favor the emergence of  
45 dependency between species, and therefore coexistence, through adaptive gene loss according to the  
46 Black Queen Hypothesis (BQH)<sup>6,12</sup>.

47 Morris *et al.* formulated three key characteristics for a function to follow the BQH. The function  
48 allowing consumption of the resource must be *i)* costly, *ii)* essential and *iii)* leaky. Atrazine is one of  
49 the most heavily applied herbicide worldwide which is relatively persistent and mobile in soil, and  
50 whose degradation products can be traced in soils decades after application<sup>13,14</sup>. Atrazine can be  
51 mineralized by microorganisms and is a source of nitrogen. Its entire biodegradation pathway is  
52 known (Fig. 1) and can be split into two parts: the upper part consisting in the dechlorination of  
53 atrazine and the removal of the two lateral chains from the *s*-triazinic cycle, followed by the lower  
54 part consisting in the complete degradation of cyanuric acid. Genes (*atz* and *trz* families) involved  
55 in its mineralization are most often located on plasmids or on catabolic cassettes delimited by  
56 insertion sequences<sup>15</sup>. Because of the cost of maintaining plasmids, atrazine genes are easily lost  
57 after only a couple of generations in culture media without atrazine<sup>16</sup>. However, in nitrogen limited  
58 environments, atrazine degrading capacities must be conserved because mineralization of atrazine  
59 leads to the essential delivery of nitrogen<sup>17</sup>. Also, exchange of metabolites, such as

60 desisopropylamine, aminoethanol and desethylamine, are produced and released in the environment  
61 during atrazine degradation<sup>18</sup>. Therefore, atrazine biodegradation is a good candidate function to test  
62 the BQH predictions, and in particular the emergence of dependency between species in a spatially  
63 unstructured environment.

64 *Chelatobacter* sp. SR38<sup>19</sup>, *Pseudomonas* sp. ADPe<sup>16</sup>, *Arthrobacter* sp. TES<sup>20</sup> and *Variovorax* sp.  
65 38R<sup>21</sup> are all originally soil bacteria isolated from arable soils exposed to atrazine. They are all able  
66 to at least partly degrade either atrazine or its intermediary products (Fig. 1). They have all been  
67 modified to resist to a different combination of two antibiotics in order to evaluate their frequency  
68 in mixed culture on double-antibiotics plates. Based on their genetic repertoire for atrazine  
69 degradation, it is quite straightforward to predict that in a liquid culture medium with atrazine as the  
70 unique nitrogen source, *Arthrobacter* sp. TES and *Pseudomonas* sp. ADPe must coexist because  
71 *Arthrobacter* sp. TES will degrade atrazine to supply its nitrogen needs and produce cyanuric acid  
72 that will be used by *Pseudomonas* sp. ADPe as its nitrogen reservoir. However, predicting what  
73 would happen in a more complex scenario where multiple competing strains evolve in  
74 environments containing various nitrogen sources is not trivial. Here, we experimentally questioned  
75 whether spatially unstructured atrazine-containing media could support coexistence of multiple  
76 atrazine degrading species through BQH mechanisms.

77 We propagated for ~ 100 generations four-species consortia, in triplicate, in seven minimal media  
78 supplemented with citrate in excess, as the carbon source, and either one among three nitrogen  
79 sources: atrazine, cyanuric acid: the metabolic product of the upper part of the atrazine degradation  
80 pathway, or ammonium sulfate; or 2-way and 3-way combinations of the above mentioned nitrogen  
81 sources, keeping the N molarity constant. We found that out of the seven media, all species  
82 coexisted in the four ones containing atrazine, *Arthrobacter* sp. TES going extinct in the three  
83 atrazine-free media (Fig 2A). The extinction of *Arthrobacter* sp. TES in cyanuric acid supplemented  
84 media was expected as it does not possess the metabolic pathway to degrade cyanuric acid, however

85 its extinction also in ammonium sulfate supplemented media is more surprising. Intriguingly, the  
86 equilibrium frequencies of the three other species, besides *Arthrobacter* sp. TES, are quite similar  
87 after ~100 generations in six out of the seven media, with *Pseudomonas* sp. ADP dominant at  $\sim 10^7$   
88 CFU.mL<sup>-1</sup> and the two remaining species at  $\sim 10^6$  CFU.mL<sup>-1</sup>, the exception being the ammonium  
89 sulfate – cyanuric acid supplemented medium where *Variovorax* sp. 38R appeared to be dominant at  
90  $\sim 10^7$  CFU.mL<sup>-1</sup>.

91 We then assessed using multiplex PCRs the presence of the atrazine degradation genes in the  
92 evolved consortia across the seven different media. We found that in the four media containing  
93 atrazine, all initially present *atz* or *trz* genes were kept in the evolved consortia, precluding the  
94 conservation of the atrazine mineralisation potential in these environments (Fig 2B). In the atrazine-  
95 free media, only *atzA*, responsible for the dechlorination of atrazine, a step that releases chlorine but  
96 does not provide any nitrogen input to cells, and *atzD*, responsible for the first step of the  
97 degradation of cyanuric acid, were conserved in the three environments while *atzC* and *trzD* were  
98 specifically kept in the ammonium sulfate – cyanuric acid supplemented medium. Since in that  
99 specific medium, *atzC* does not confer any advantage to its carrier, *Chelatobacter* sp. SR38, it has  
100 likely been carried along because of its colocalization with *trzD* on the same plasmid<sup>22</sup>, responsible  
101 for the degradation of cyanuric acid. Rapid evolution, probably through the loss of *atz* genes  
102 containing plasmids, therefore led to the loss of the atrazine degradation function in atrazine-free  
103 environments, confirming the genetic load of maintaining atrazine genes in atrazine uncontaminated  
104 environments.

105 We then evaluated the atrazine mineralization potential, using <sup>14</sup>C-atrazine either labelled on the  
106 ethylamino chain or on the s-triazinic cycle, of the consortia that have evolved in the four atrazine  
107 containing environments (Fig 3) and compared them to the ancestral ones. Interestingly, we  
108 observed a significant increase of the mineralization potential of the ethylamino chain in evolved  
109 consortia compared to ancestors in all but the three nitrogen sources supplemented medium. The

110 observed gain is however much stronger in the atrazine only supplemented medium (from 48 % ;  
111  $CI_{95\%}=[41.9 - 54.1]$  to 71.4 % ;  $CI_{95\%}=[69.4 - 73.4]$  ). When evaluating the mineralization potential  
112 of the *s*-triazinic cycle, results are quite contrasted with a significant increase of the mineralization  
113 potential in the atrazine only supplemented medium (from 48.3 % ;  $CI_{95\%}=[36.5 - 60]$  to 86.9 %;  
114  $CI_{95\%}=[81.6 - 92.2]$ ), and significant decreases or no change in the two and three nitrogen sources  
115 supplemented media. Altogether, these results indicate that the upper part of the atrazine  
116 degradation pathway (*atzA*, *trzN*, *atzB* and *atzC*) has been improved in the evolved consortia,  
117 presumably leading to increased intermediary metabolite production, such as aminoethanol,  
118 ethylamine or hypoxanthine<sup>18</sup>. While the upper pathway is constitutively expressed, studies have  
119 shown that the lower pathway was repressed by the presence of ammonium in the environment<sup>23</sup>. It  
120 is therefore quite likely that the stronger accumulation of intermediary metabolites and their  
121 consumption by consortium members led to an increased concentration of ammonium in the  
122 environment explaining the decreased mineralization potential of the *s*-triazinic cycle in evolved  
123 consortia compared to ancestors.

124 The impressive boost of atrazine mineralization potential observed in the medium supplemented  
125 only with atrazine led us to focus on phenotypic and genotypic changes that occurred in this specific  
126 environment. We therefore isolated members of the evolved consortia, evaluated individually their  
127 genetic repertoire using multiplex PCRs, and assessed their corresponding growth characteristics  
128 using Bioscreen<sup>TM</sup> assays. We found that only *Arthrobacter* sp. TES was able to grow in isolated  
129 culture, while the three other members of the evolved consortia depend on *Arthrobacter* sp. TES to  
130 grow in this medium (Fig 4A). This acquired dependency for *Chelatobacter* sp. SR38 and  
131 *Variovorax* sp. 38R is explained by losses of part of their *atz* genes repertoire (Fig 4B).  
132 *Chelatobacter* sp. SR38 lost part of the upper pathway via *atzA* and *atzB* removal, while *Variovorax*  
133 sp. 38R kept only *atzA*, responsible for dechlorination of atrazine which does not provide any  
134 nitrogen containing by-product. We then wanted to characterize the interactions between members

135 of the evolved consortia. We therefore reconstructed all possible duos and trios, and compared  
136 growth performances of each member to their performance in the evolved four-species consortia  
137 and in monoculture over 3.5 days (Extended Data Fig 1). A relatively simple and straightforward  
138 interaction scheme can be drawn from these results (Fig 4C): *Variovorax* sp. 38R, *Chelatobacter* sp.  
139 SR38 and *Pseudomonas* sp. ADP growths are clearly supported by *Arthrobacter* sp. TES. However,  
140 *Arthrobacter* sp. TES is penalized in duos or trios with *Chelatobacter* sp. SR38 and *Pseudomonas*  
141 sp. ADP, in the absence of *Variovorax* sp. 38R. Interestingly, *Variovorax* sp. 38R by itself has no  
142 positive effect on *Arthrobacter* sp. TES, but it counteracts the negative impacts of the two other  
143 consortium members on *Arthrobacter* sp. TES. Therefore, coexistence of the four members might  
144 be favoured, even though two of the three direct beneficiaries exert antagonistic relationships  
145 against the public goods provider, because the third one acts as a buffering intermediary.

146 Here, we have witnessed the establishment of dependencies in a four species artificial consortium  
147 after evolution in an unstructured, atrazine only supplemented medium during ~100 generations.  
148 According to the BQH, dependency was set up *via* adaptive gene loss, and one specific member of  
149 the consortium, *Arthrobacter* sp. TES ensuring the costly part of the function, became the provider  
150 of public goods to the three other beneficiaries, *Variovorax* sp. 38R, *Chelatobacter* sp. SR38 and  
151 *Pseudomonas* sp. ADP. In many cases, pesticide degradation in nature is thought to occur through  
152 the involvement of microbial consortia, rather than being the corollary of a single species<sup>4</sup>. Our  
153 study provides strong experimental evidences, using the herbicide atrazine as a case study, that the  
154 division of labour between populations in microbial communities might be the rule when  
155 considering the biodegradation of xenobiotics.

## 156 **METHODS**

### 157 ***Experimental Evolution***

158 Four strains with variable atrazine degrading abilities (*Pseudomonas* sp. ADPe, *Chelatobacter* sp.  
159 SR38, *Arthrobacter* sp. TES and *Variovorax* sp. 38R, Fig. 1) were cultivated in seven media in four  
160 species consortia (n=3) constituting “community” evolution lines. Mineral salt (MS) media  
161 ( $K_2HPO_4$  9.2 mM,  $KH_2PO_4$  3.0 mM,  $CaCl_2$  0.2 mM,  $MgSO_4 \cdot 7H_2O$  0.8 mM, NaCl 1.7 mM,  $H_3BO_3$   
162 32.3  $\mu$ M,  $FeSO_4 \cdot 6 H_2O$  19.2  $\mu$ M,  $MnSO_4 \cdot H_2O$  10.6  $\mu$ M, NaMo 2.1  $\mu$ M,  $ZnSO_4$  1.2  $\mu$ M,  $CuSO_4$   
163 0.63  $\mu$ M, biotin 0.4  $\mu$ M, thiamin 0.15  $\mu$ M,) containing citrate as carbon source (5 mM) were  
164 supplemented with varied nitrogen sources combinations (atrazine, cyanuric acid,  $(NH_4)_2SO_4$ , or 2  
165 and 3 sources combinations) with a final nitrogen equimolarity of 1.4 mM (7 media). The evolution  
166 experiment was realized in 96-wells 2 mL Deepwell microplate at 28°C without agitation during 23  
167 growing cycles of 3.5 days each. For each new cycle, 35  $\mu$ L of previous culture was used as  
168 inoculum for the next cycle into 700  $\mu$ L fresh medium (1/20 dilution, ( $\log_2(20) \times 23$  cycles  $\sim$  100  
169 generations)). An aliquot of each cycle culture was mixed with glycerol (30% final concentration)  
170 and preserved at -80°C.

### 171 ***Species composition***

172 We were able to easily identify the four strains in the ancestor and evolved “community” lines  
173 because each of them was double-resistant to a different combination of two of the following  
174 antibiotics: rifampicin 100mg/L, kanamycin 50mg/L, spectinomycin 100 mg/l, streptomycin  
175 100mg/L. To do so, each bacterial strain was grown in MS medium containing either atrazine or  
176 cyanuric acid as the nitrogen source and then spread on solid rich medium (TY) containing the  
177 antibiotic for which it was to be resistant. Resistant growing colonies were collected and cultivated  
178 in their specific liquid MS medium to ensure that they have kept their metabolic ability towards  
179 atrazine. This procedure was repeated to confer a second resistance to each strain. *Pseudomonas* sp.



180 ADPe is Strep<sup>+</sup>/Rif<sup>+</sup>, *Chelatobacter* sp. SR38 is Kan<sup>+</sup>/Strep<sup>+</sup>, *Arthrobacter* sp. TES is Spec<sup>+</sup>/Rif<sup>+</sup>  
181 and *Variovorax* sp. 38R is Spec<sup>+</sup>/Kan<sup>+</sup>.

182 Ten-fold successive dilutions of T1 and T23 “community” lines were done and inoculated onto LB  
183 agar plates supplemented with different antibiotic combinations. After 3-days of growth at 28°C,  
184 CFU were counted across 3 dilution levels.

### 185 ***Atrazine-degrading genetic repertoire***

186 Multiplex PCR targeting *atzA/atzD/trzD* and *atzC/trzN/atzB* genes were used to determine the  
187 atrazine degradation repertoire of each strain of the ancestral and evolved “community” lines. 3 or 4  
188 isolated colonies from the ancestral and evolved “community” lines were resuspended in water and  
189 served as DNA template for PCR reactions. PCR reactions were conducted using the following  
190 primers [*atzA* (5'- TGA AGC GTC CAC ATT ACC-3', 5'- CCA TGT GAA CCA GAT CCT-3'),  
191 *atzD* (5'- GGG TCT CGA GGA TTT GAT TG-3', 5'-TCC CAC CTG ACA TCA CAA AC-3')  
192 *trzD*5'- CCT CGC GTT CAA GGT CTA CT-3', 5'-TCG AAG CGA TAA CTG CAT TG-3'] or  
193 [*trzN* (5'-CAC CAG CAC CTG TAC GAA GG-3', 5'-GAT TCG AAC CAT TCC AAA CG-3'),  
194 *atzB* (5'- CAC CAC TGT GCT GTG GTA GA-3', 5'-AGG GTG TTG AGG TGG TGA AC-3'),  
195 *atzC* (5'- GTACCATATCACCGTTGCCA-3', 5'-GCTCACATGCAGGTACTIONTCCA-3')] at a final  
196 concentration of 10 μM each, the temperature of primers annealing being of 57°C and the  
197 elongation time of 1 minute.

### 198 ***Atrazine mineralisation activity***

199 Ancestors and “community” lines that have evolved on the four media containing atrazine were  
200 inoculated at ~0.001 OD<sub>600nm</sub> in 200 μL fresh medium supplemented with 4000 dpm final of <sup>14</sup>C  
201 atrazine labelled either on the ethylamino chain or on the s-triazine cycle in triplicate. Cultures were  
202 then placed at 28°C. A whatman® 3mm Chr paper soaked with barite (saturated solution 0.37M)  
203 was placed and sealed on the top of the 96-wells plates and replaced periodically during 3.5 days.  
204 Dried papers were fluorography printed on Storage PhosphorScreen (Molecular Dynamics®) for 2

205 days. Screens were scanned by a phosphorimager (Storm 860 Molecular Imager). Indirect reading  
206 of released radioactivity intensity was done by ImageQuant 5.2 software, and referred to a standard  
207 curve. Mineralisation percentages of lines were determinate with respect to initial radioactivity  
208 dosage realized on 200  $\mu$ L of each culture medium with a Beckman® liquid scintillation counter.

### 209 ***Population dynamics characteristics of the ancestral and evolved line***

210 The population dynamics of ancestral and evolved “community” lines were measured using  
211 Bioscreen™. All lines were inoculated at  $\sim 0.001$  OD<sub>600nm</sub> in 400  $\mu$ L of their evolution medium (n=3  
212 for each replicate of each line) in Bioscreen™ plates. Plates were incubated 3.5 days at 28°C and  
213 the evolution of OD<sub>600nm</sub> was monitored every 10 minutes after a 10-seconds gentle shake.  
214 Population dynamics characteristics of each strain that has evolved in “community” lines was also  
215 measured the same way starting from 10 CFU isolated from the evolved “community” lines as  
216 inoculums and inoculated at  $\sim 0,001$  OD<sub>600nm</sub>. Those data were used to determine the maximal  
217 OD<sub>600nm</sub>. Cultures that did not reach 0.1 OD<sub>600nm</sub> at the end of the 3.5 days were considered as non-  
218 growing.

### 219 ***Evaluating interactions between the four evolved species in the atrazine only supplemented*** 220 ***medium***

221 For each strain, ten CFU isolated from each community-evolved lines (n=3) in MS-Citrate Atrazine  
222 were used as inoculum pools. 4-species consortia, as well as all possible duos and trios were  
223 reconstructed and compared to monocultures. Mixtures and monocultures were inoculated at  $\sim 0,001$   
224 OD<sub>600nm</sub> and final population densities, after a 3.5 days cycle, were measured for each strain by CFU  
225 plating on TY medium supplemented with the appropriate antibiotics combinations.

226 **REFERENCES**

227

- 228 1. Fenner, K., Canonica, S., Wackett, L. & Elsner, M. Evaluating pesticide degradation in the  
229 environment: Blind spots and emerging opportunities. *Science*. **341**, 752-758 (2013).
- 230 2. Udikovic-Kolic, N. *et al.* Genetic potential, diversity and activity of an atrazine-degrading  
231 community enriched from a herbicide factory effluent. *J. Appl. Microbiol.* **105**, 1334-134  
232 (2008).
- 233 3. de Souza, M. L. *et al.* Molecular basis of a bacterial consortium: interspecies catabolism of  
234 atrazine. *Appl. Environ. Microbiol.* **64**, 178-184 (1998).
- 235 4. Smith, D., Alvey, S. & Crowley, D. E. Cooperative catabolic pathways within an atrazine-  
236 degrading enrichment culture isolated from soil. *FEMS Microbiol. Ecol.* **53**, 265-275 (2005).
- 237 5. Yang, C. *et al.* Atrazine degradation by a simple consortium of *Klebsiella* sp. A1 and  
238 *Comamonas* sp. A2 in nitrogen enriched medium. *Biodegradation*. **21**, 97-105 (2010).
- 239 6. Morris, J. J., Lenski, R. E. & Zinser, E. R. The Black Queen Hypothesis: evolution of  
240 dependencies through adaptive gene loss. *mBio*. **3**, e00036-00012 (2012).
- 241 7. Chao, L. & Levin, B. R. Structured habitats and the evolution of anticompetitor toxins in  
242 bacteria. *Proc. Natl. Acad. Sci. USA* **78**, 6324-6328 (1981).
- 243 8. Travisano, M. & Velicer, G. J. Strategies of microbial cheater control. *Trends Microbiol.* **12**,  
244 72-78 (2004).
- 245 9. Kerr, B., Neuhauser C., Bohannan B. J. M. & Dean, A. M. Local migration promotes  
246 competitive restraint in a host-pathogen ‘tragedy of the commons’. *Nature*. **442**, 75-78  
247 (2006).
- 248 10. Hassell, M. P., Comins, H. N. & May, R. M. Species coexistence and self-organizing spatial  
249 dynamics. *Nature*. **370**, 290-292 (1994).
- 250 11. Hardin, G. The competitive exclusion principle. *Science*. **131**, 1292-1297 (1960).

- 251 12. Mas, A., Jamshidi, S., Lagadeuc, Y., Eveillard, D. & Vandenkoornhuyse, P. Beyond the  
252 Black Queen Hypothesis. *The ISME J.* **10**, 2085-2091 (2016).
- 253 13. Jablonowski, N. D., Köppchen, S., Hofmann, D., Schäffer, A. & Burauel, P. Persistence of  
254 <sup>14</sup>C-labelled atrazine and its residues in a field lysimeter soil after 22 years. *Environ Pollut.*  
255 **157**, 2126-2131 (2009).
- 256 14. Chiai-Hernandez, A. C. *et al.* Long-term persistence of pesticides and TPs in archived  
257 agricultural soil samples and comparison with pesticide application. *Environ. Sci. Technol.*  
258 **51**, 10642-10651 (2017).
- 259 15. Devers, M., El Azhari, N., Kolic, N.U., Martin-Laurent, F. Detection and organization of  
260 atrazine-degrading genetic potential of seventeen bacterial isolates belonging to divergent  
261 taxa indicate a recent common origin of their catabolic functions. *FEMS Microbiol. Lett.*  
262 **273**, 78-86 (2007).
- 263 16. Changey, F., Devers-Lamrani, M., Rouard, N. & Martin-Laurent, F. *In vitro* evolution of an  
264 atrazine-degrading population under cyanuric acid selection pressure: evidence for the  
265 selective loss of a 47 kb region on the plasmid ADP1 containing the *atzA*, *B* and *C* genes.  
266 *Gene.* **490**, 18-25 (2011).
- 267 17. Govantes, F. *et al.* Regulation of the atrazine-degradative genes in *Pseudomonas* sp. ADP.  
268 *FEMS Microbiol Lett.* **310**, 1-8 (2010).
- 269 18. Xu, X. *et al.* Modeling microbial communities from atrazine contaminated soils promotes  
270 the development of biostimulation solutions. *The ISME J.* **13**, 494-508 (2019).
- 271 19. Rousseaux, S., Hartmann, A. & Soulas, G. Isolation and characterization of new Gram-  
272 negative and Gram-positive atrazine degrading bacteria from different French soils. *FEMS*  
273 *Microbiol. Ecol.* **36**, 211-222 (2001).

- 274 20. El Sebaï, T., Devers-Lamrani, M., Changey, F., Rouard, N. & Martin-Laurent, F. Evidence  
275 of atrazine mineralization in a soil from the Nile Delta: Isolation of *Arthrobacter* sp. TES6,  
276 an atrazine-degrading strain. *Int. Biodeter. Biodegr.* **65**, 1249-1255 (2011).
- 277 21. Devers, M., Henry, S., Hartmann, A. & Martin-Laurent, F. Horizontal gene transfer of  
278 atrazine-degrading genes (*atz*) from *Agrobacterium tumefaciens* St96-4 pADP1::Tn5 to  
279 bacteria of maize-cultivated soil. *Pest. Manag. Sci.* **61**, 870-880 (2005).
- 280 22. Rousseaux, S., Soulas, G. & Hartmann, A. Plasmid localisation of atrazine-degrading genes  
281 in newly described *Chelatobacter* and *Arthrobacter* strains. *FEMS Microbiol. Ecol.* **41**, 69-  
282 75 (2002).
- 283 23. Garcia-González, V. *et al.* Distinct roles for NtrC and GlnK in nitrogen regulation of the  
284 *Pseudomonas* sp. strain ADP cyanuric acid utilization operon. *FEMS Microbiol. Lett.* **300**,  
285 222-229 (2009).
- 286

287 **ACKNOWLEDGEMENTS**

288

289 We thank L. Philippot for comments and discussion. Grants from FP7-PEOPLE-2012-IAPP  
290 (Industry-Academia Partnerships and Pathways) Marie-Curie project ‘Love-to-Hate’ funded by the  
291 European Commission (Grant Agreement number 389 324349) supported this work.

292

293 **AUTHOR CONTRIBUTIONS**

294

295 LB: laboratory experiments, data analysis, manuscript writing. MD: study conception, laboratory  
296 experiments, manuscript editing. NR: laboratory experiments. FM-L: study conception, manuscript  
297 editing. AS: study conception, data analysis, manuscript writing.

298

299 **AUTHOR INFORMATION**

300

301 The authors declare that no competing interests exist. Correspondence and requests for materials  
302 should be addressed to [ayme.spor@inra.fr](mailto:ayme.spor@inra.fr).

303

304 **FIGURE LEGENDS**

305

306 **Figure 1. Atrazine metabolic degradation pathway and strains used.** **a**, intermediary products of  
307 the upper and lower parts of the metabolic degradation of atrazine, as well as genes associated with  
308 the different reactions are indicated. **b**, the four ancestral strains, as well as their corresponding  
309 atrazine degrading gene repertoire are indicated. Genes encoding enzymes involved in the  
310 formation of N-containing by-products are coloured in blue while genes encoding enzymes  
311 involved in the formation of C-containing by-products are contoured.

312

313 **Figure 2. Community composition of the ancestral and evolved consortia across the seven**  
314 **selection media.** **a**, species composition of the ancestral and evolved consortia across the seven  
315 selection media. Abundances are expressed in log<sub>10</sub> CFU.mL<sup>-1</sup>. Black, red, green and blue bars  
316 correspond respectively to *Variovorax* sp. 38R, *Pseudomonas* sp. ADPe, *Chelatobacter* sp. SR38  
317 and *Arthrobacter* sp. TES. *atz*, *nh4* and *cya* respectively stands for nitrogen source used either  
318 atrazine, ammonium or cyanuric acid. **b**, atrazine-degrading genetic potential of the ancestral and  
319 evolved consortia across the seven selection medium evaluated *via* multiplex PCRs.  
320 Presence/absence of the corresponding genes is indicated with the presence/absence of the  
321 corresponding coloured or hatched rectangle on the model scheme.

322

323 **Figure 3. Atrazine mineralization potential of the ancestral and evolved consortia.** The  
324 mineralization potentials of the ethylamino chain (**a**) and the s-triazinic cycle (**b**) were evaluated  
325 with <sup>14</sup>C-labelled atrazine across the four atrazine-containing selection media. <sup>14</sup>C-labelled atoms  
326 are indicated in red on the atrazine molecule. *atz*, *nh4* and *cya* respectively stands for atrazine,  
327 ammonium and cyanuric acid. Significant differences between ancestral (dark grey bars) and  
328 evolved (light grey bars) consortia performances are indicated with a star (p < 0.05).

329

330 **Figure 4. Interspecies dependency for atrazine degradation.** **a**, growth performances of the  
331 ancestral (grey bars) and community-evolved (black bars) strains estimated as the final OD<sub>600nm</sub>  
332 reached after a 3.5 days cycle. Strains were considered as non-growing if their final OD<sub>600nm</sub> was <  
333 0.1 Arbitrary Units (AU). **b**, atrazine-degrading genetic repertoire of the community-evolved strains  
334 and corresponding metabolic reactions. **c**, interactions scheme drawn from mono- and co-cultures of  
335 the four community-evolved strains in the atrazine only supplemented medium. Arrows represent  
336 either positive (+) or negative (-) interactions. The dotted arrow expresses the conditional positive  
337 effect of *Variovorax* sp. 38R on *Arthrobacter* sp. TES in the presence of the two other strains.



338 **EXTENDED DATA LEGENDS**

339

340 **Extended Data Figure 1.** Evaluating interactions between the four species evolved in the atrazine  
341 only supplemented medium. Growth performances of evolved *Variovorax* sp. 38R (**a**), *Arthrobacter*  
342 sp. TES (**b**), *Chelatobacter* sp. SR38 (**c**) and *Pseudomonas* sp. ADPe (**d**) at the end of a 3.5 days  
343 cycle in monoculture, as well as in reconstructed duos, trios and in the 4-species consortium were  
344 evaluated using CFU plating on TY medium supplemented with the adequate antibiotics  
345 combinations. Bars represent mean values with s.e.m (n=3).

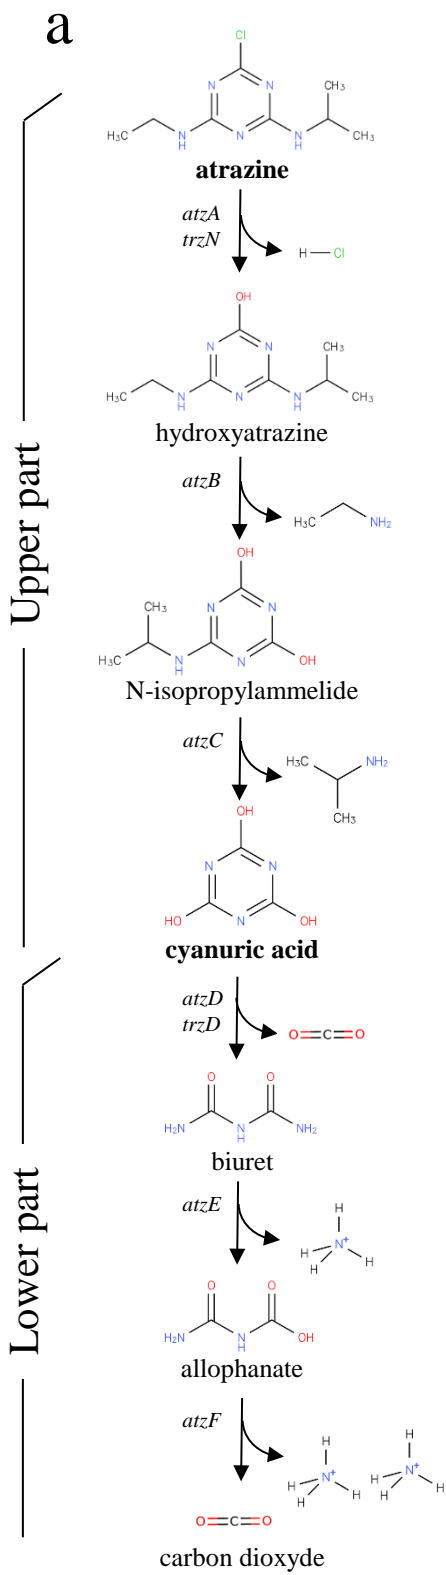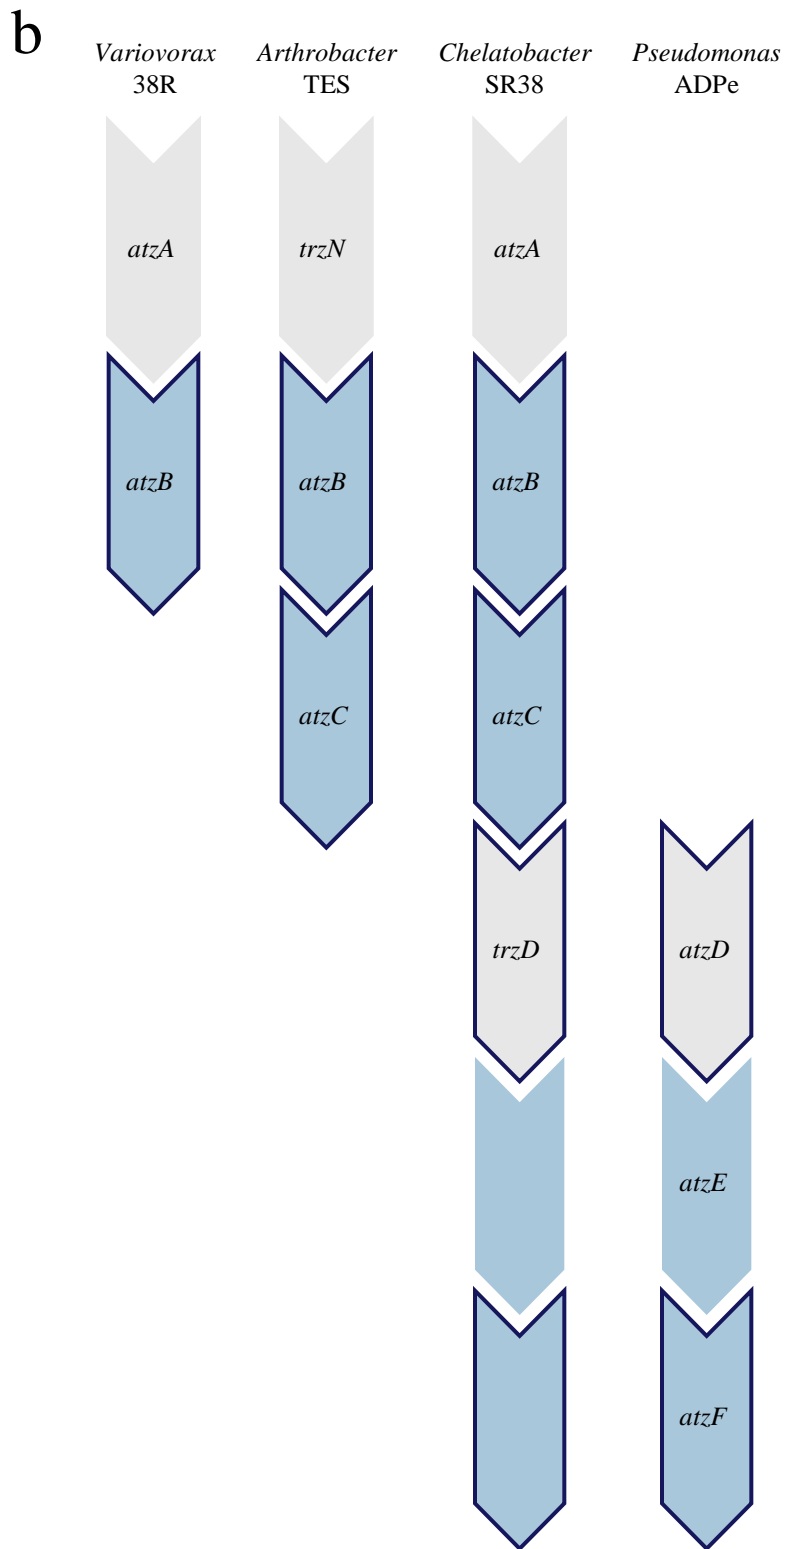

a

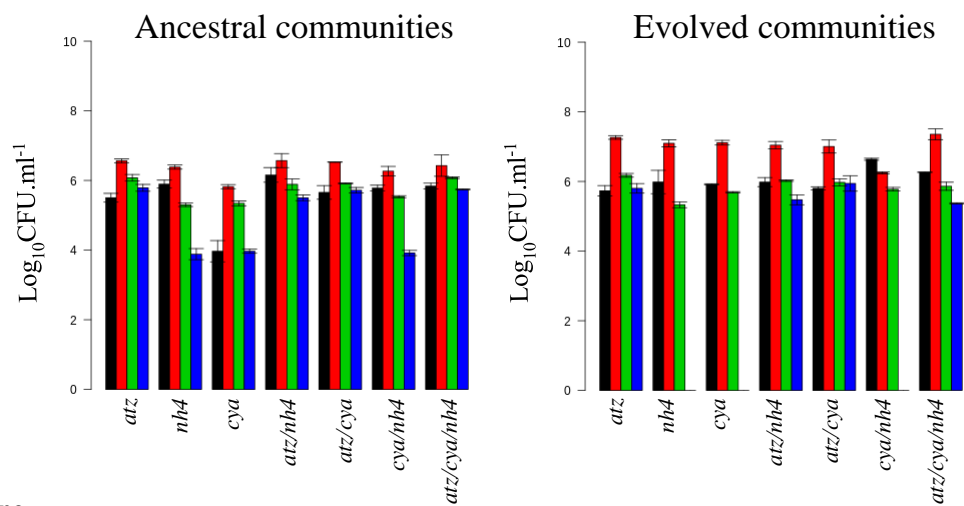

b

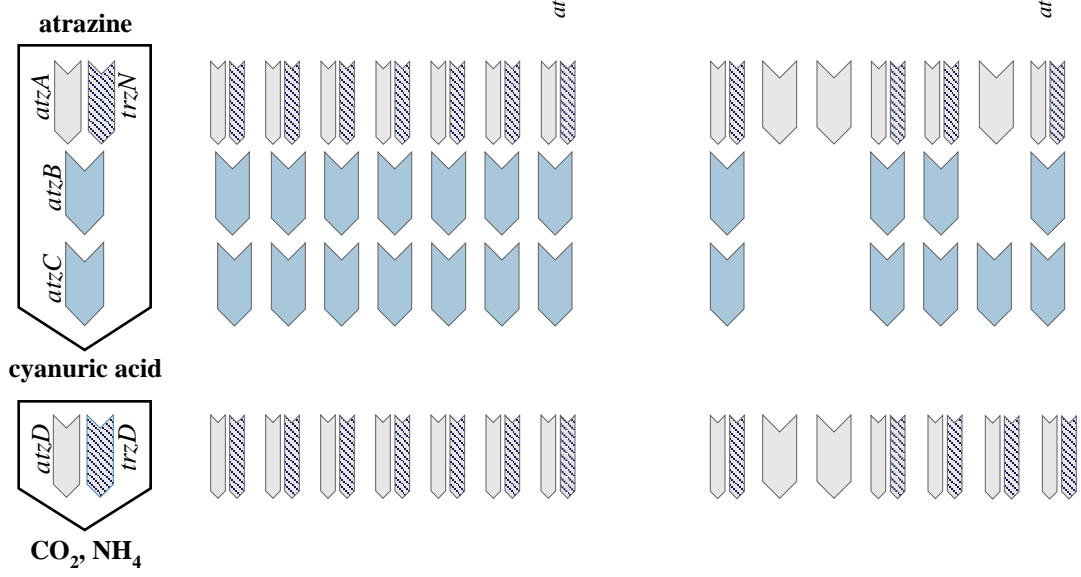

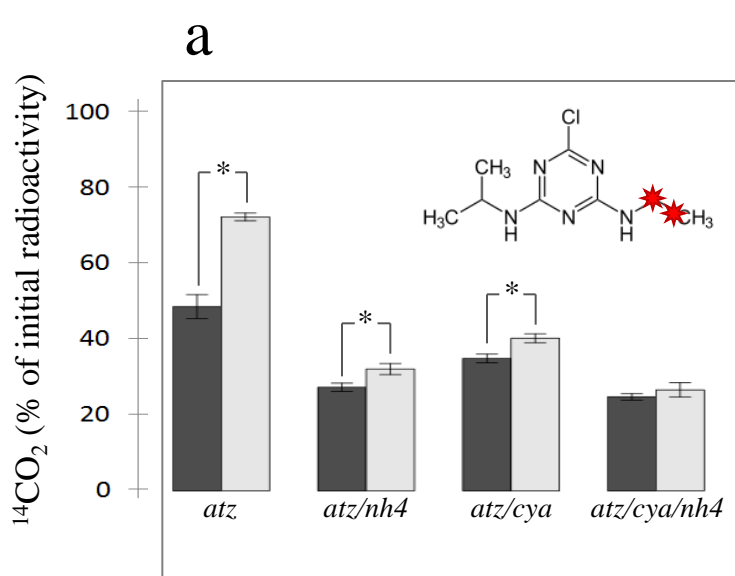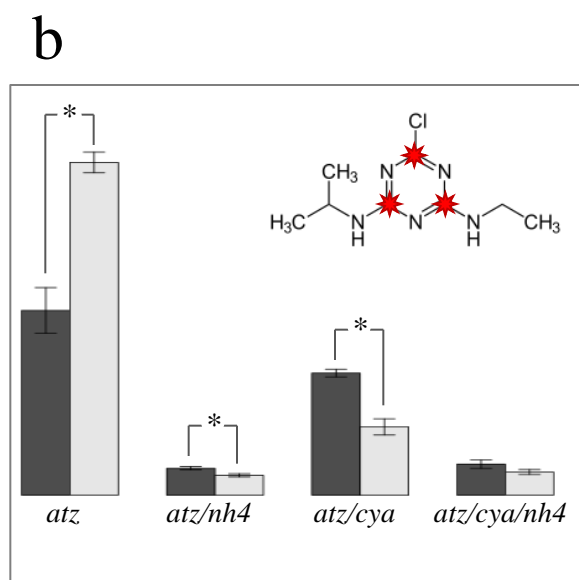

a

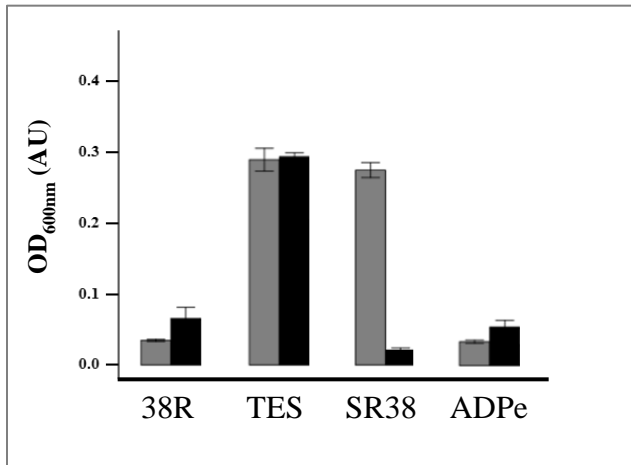

c

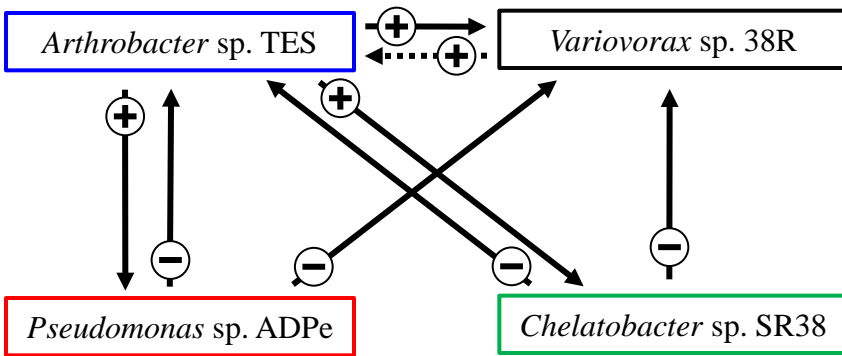

b

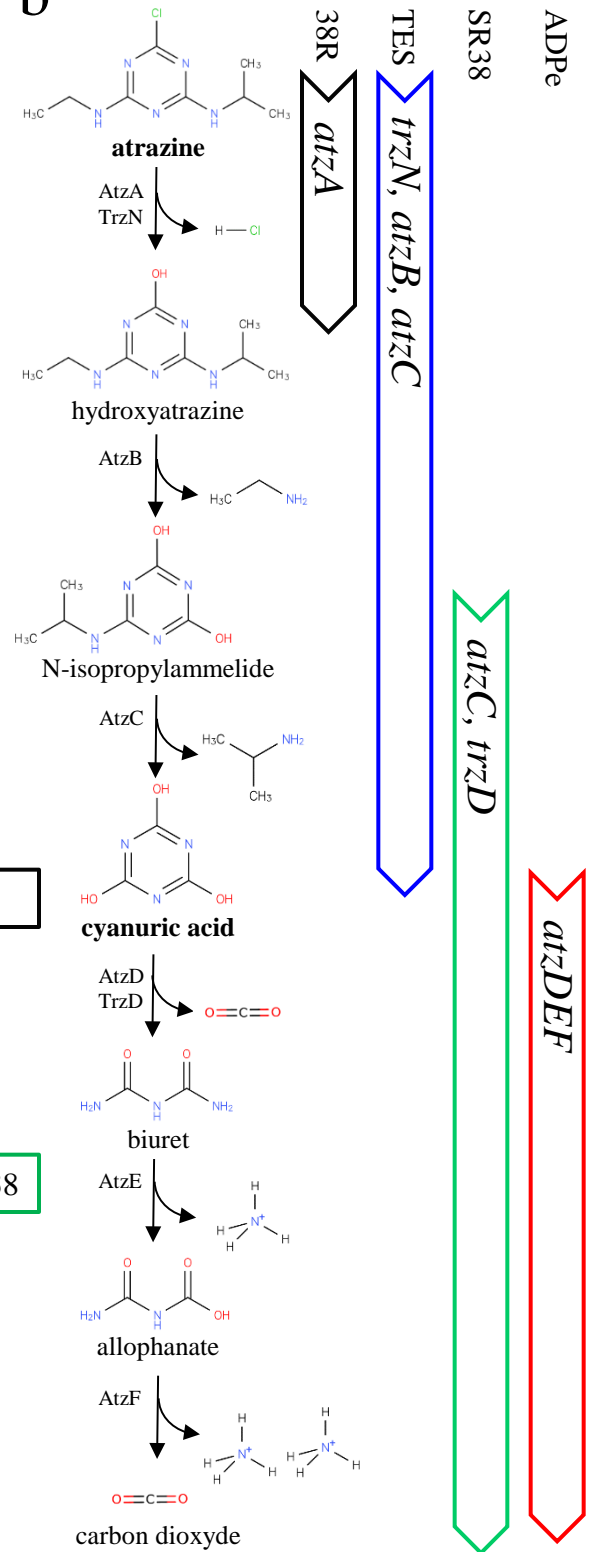

Source: http://biorxiv.org/content/10.1101/581041v1.full.pdf
